# Supplementary material for: Photoelectron spectroscopy and density functional calculations of CnSm− (n = 2–7; m = 1, 2) clusters
Source: Royal Society of Chemistry journal article supplement (doi:10.1039/c5cp04482k), 2015-01-01
Supplement: c5cp04482k1.pdf [file c5cp04482k1.pdf]

## *Supplementary Information*

### **Photoelectron Spectroscopy and Density Functional Calculations of $C_nS_m^-$ ( $n = 2-7$ ; $m = 1, 2$ ) clusters**

Xi-Ling Xu, Xiao-Jiao Deng, Hong-Guang Xu, Wei-Jun Zheng\*

*Beijing National Laboratory for Molecular Sciences, State Key Laboratory of Molecular Reaction Dynamics, Institute of Chemistry, Chinese Academy of Sciences, Beijing 100190, China*

\* Corresponding author. E-mail: [zhengwj@iccas.ac.cn](mailto:zhengwj@iccas.ac.cn)

Tel: +86 10 62635054, Fax: +86 10 62563167

**Table S1** The relative energies and vertical detachment energies (VDEs) of  $C_nS^-$  ( $n = 2-4$ ) calculated from the B3LYP/6-311+G(3d) and CCSD(T)/aug-cc-pVTZ level of theory.

| Isomer   | State | Sym.    | $\Delta E(\text{eV})$ |                      | VDE(eV)            |                      |      |
|----------|-------|---------|-----------------------|----------------------|--------------------|----------------------|------|
|          |       |         | B3LYP <sup>a</sup>    | CCSD(T) <sup>b</sup> | B3LYP <sup>a</sup> | CCSD(T) <sup>b</sup> |      |
| $C_2S^-$ | 2A    | $^2\Pi$ | $C_{\infty v}$        | 0.00                 | 0.00               | 2.79                 | 2.81 |
|          | 2B    | $^4A''$ | $C_s$                 | 2.70                 | 2.76               | 0.80                 | 0.63 |
| $C_3S^-$ | 3A    | $^2A'$  | $C_s$                 | 0.00                 | 0.00               | 1.85                 | 1.62 |
|          | 3B    | $^2B_2$ | $C_{2v}$              | 0.56                 | 0.40               | 2.74                 | 2.48 |
|          | 3C    | $^4A''$ | $C_s$                 | 2.30                 | 2.36               | 1.89                 | 1.79 |
| $C_4S^-$ | 4A    | $^2\Pi$ | $C_{\infty v}$        | 0.00                 | 0.00               | 3.26                 | 3.37 |
|          | 4B    | $^2B_1$ | $C_{2v}$              | 1.34                 | 1.20               | 3.24                 | 3.01 |
|          | 4C    | $^2A''$ | $C_s$                 | 1.87                 | 1.58               | 3.66                 | 3.48 |

<sup>a</sup> B3LYP with 6-311+G(3d) basis set.

<sup>b</sup> CCSD(T) with aug-cc-pVTZ basis set.

**Table S2** Cartesian coordinates for stable isomers of  $C_nS^-$  and  $C_nS_2^-$  ( $n = 2-7$ ) clusters.

| $C_2S^-$ |            |            |             |   |             |             |            |
|----------|------------|------------|-------------|---|-------------|-------------|------------|
|          | <b>2A</b>  |            |             |   | <b>2B</b>   |             |            |
|          | X          | Y          | Z           |   | X           | Y           | Z          |
| C        | 0.00000000 | 0.00000000 | -0.66450500 | C | 0.00000000  | 0.80597800  | 0.00000000 |
| C        | 0.00000000 | 0.00000000 | -1.93886800 | C | 1.33613200  | 1.24811200  | 0.00000000 |
| S        | 0.00000000 | 0.00000000 | 0.97626500  | S | -0.50104900 | -0.77028400 | 0.00000000 |

  

| $C_3S^-$ |             |             |            |   |            |             |             |
|----------|-------------|-------------|------------|---|------------|-------------|-------------|
|          | <b>3A</b>   |             |            |   | <b>3B</b>  |             |             |
|          | X           | Y           | Z          |   | X          | Y           | Z           |
| C        | 1.14888400  | 0.73145400  | 0.00000000 | C | 0.00000000 | 0.00000000  | -0.32849700 |
| C        | 0.00000000  | 0.12804200  | 0.00000000 | C | 0.00000000 | 0.67567400  | -1.58572400 |
| C        | 2.26275000  | 1.37512500  | 0.00000000 | C | 0.00000000 | -0.67567400 | -1.58572400 |
| S        | -1.27936300 | -0.83798300 | 0.00000000 | S | 0.00000000 | 0.00000000  | 1.31247900  |

  

| <b>3C</b> |             |             |            |
|-----------|-------------|-------------|------------|
|           | X           | Y           | Z          |
| C         | 1.25557500  | 0.20213500  | 0.00000000 |
| C         | 0.00000000  | 0.61985600  | 0.00000000 |
| C         | 2.53791900  | -0.07056000 | 0.00000000 |
| S         | -1.42256000 | -0.28178700 | 0.00000000 |

  

| $C_4S^-$ |            |            |             |   |            |             |             |
|----------|------------|------------|-------------|---|------------|-------------|-------------|
|          | <b>4A</b>  |            |             |   | <b>4B</b>  |             |             |
|          | X          | Y          | Z           |   | X          | Y           | Z           |
| C        | 0.00000000 | 0.00000000 | 0.50417900  | C | 0.00000000 | 0.00000000  | -0.94709500 |
| C        | 0.00000000 | 0.00000000 | -0.74594600 | C | 0.00000000 | 0.00000000  | 0.33166000  |
| C        | 0.00000000 | 0.00000000 | -2.07585200 | C | 0.00000000 | 0.66930900  | -2.27376000 |
| C        | 0.00000000 | 0.00000000 | -3.34369300 | C | 0.00000000 | -0.66930900 | -2.27376000 |
| S        | 0.00000000 | 0.00000000 | 2.12299200  | S | 0.00000000 | 0.00000000  | 1.93610800  |

  

| <b>4C</b> |             |             |            |
|-----------|-------------|-------------|------------|
|           | X           | Y           | Z          |
| C         | 0.00000000  | -0.43817000 | 0.00000000 |
| C         | -1.31123400 | -0.78514800 | 0.00000000 |
| C         | 1.31919600  | -0.70024500 | 0.00000000 |
| S         | 0.94342200  | 1.13704700  | 0.00000000 |
| C         | -2.52375300 | -1.10856300 | 0.00000000 |

$C_5S^-$ 

|   |            | <b>5A</b>  |             |   |            |             | <b>5B</b>   |   |   |
|---|------------|------------|-------------|---|------------|-------------|-------------|---|---|
|   |            | X          | Y           | Z |            |             | X           | Y | Z |
| C | 0.00000000 | 0.00000000 | 1.11585200  | C | 0.00000000 | 0.00000000  | -1.63954300 |   |   |
| C | 0.00000000 | 0.00000000 | -0.15679300 | C | 0.00000000 | 0.00000000  | -0.30891400 |   |   |
| C | 0.00000000 | 0.00000000 | -1.43805600 | C | 0.00000000 | 0.67462100  | -2.90069300 |   |   |
| C | 0.00000000 | 0.00000000 | -2.74464600 | C | 0.00000000 | -0.67462100 | -2.90069300 |   |   |
| C | 0.00000000 | 0.00000000 | -4.02008100 | C | 0.00000000 | 0.00000000  | 0.94045300  |   |   |
| S | 0.00000000 | 0.00000000 | 2.71639700  | S | 0.00000000 | 0.00000000  | 2.55352100  |   |   |
|   |            | <b>5C</b>  |             |   |            |             |             |   |   |
| C | 0.00000000 | 0.00000000 | 1.11774700  |   |            |             |             |   |   |
| C | 0.00000000 | 0.00000000 | -0.15195700 |   |            |             |             |   |   |
| C | 0.00000000 | 0.00000000 | -1.45573600 |   |            |             |             |   |   |
| C | 0.00000000 | 0.00000000 | -2.75359400 |   |            |             |             |   |   |
| C | 0.00000000 | 0.00000000 | -4.06144300 |   |            |             |             |   |   |
| S | 0.00000000 | 0.00000000 | 2.73936900  |   |            |             |             |   |   |

 $C_6S^-$ 

|   |             | <b>6A</b>   |             |   |            |             | <b>6B</b>   |   |   |
|---|-------------|-------------|-------------|---|------------|-------------|-------------|---|---|
|   |             | X           | Y           | Z |            |             | X           | Y | Z |
| C | 0.00000000  | 0.00000000  | -3.42292500 | C | 0.00000000 | 0.00000000  | -0.97781000 |   |   |
| C | 0.00000000  | 0.00000000  | -2.09794500 | C | 0.00000000 | 0.00000000  | 0.31987200  |   |   |
| C | 0.00000000  | 0.00000000  | -0.84922300 | C | 0.00000000 | 0.00000000  | 1.58061800  |   |   |
| C | 0.00000000  | 0.00000000  | 0.46673000  | C | 0.00000000 | 0.00000000  | -2.26093000 |   |   |
| C | 0.00000000  | 0.00000000  | 1.71875200  | C | 0.00000000 | 0.66742900  | -3.57627900 |   |   |
| C | 0.00000000  | 0.00000000  | -4.68926500 | C | 0.00000000 | -0.66742900 | -3.57627900 |   |   |
| S | 0.00000000  | 0.00000000  | 3.32770400  | S | 0.00000000 | 0.00000000  | 3.18405300  |   |   |
|   |             | <b>6C</b>   |             |   |            |             |             |   |   |
| C | 1.68454600  | -2.89787900 | 0.00000000  |   |            |             |             |   |   |
| C | 1.10774600  | -1.74501100 | 0.00000000  |   |            |             |             |   |   |
| C | 0.53541100  | -0.57108600 | 0.00000000  |   |            |             |             |   |   |
| C | 0.00000000  | 0.56577700  | 0.00000000  |   |            |             |             |   |   |
| C | -0.49438300 | 1.80744900  | 0.00000000  |   |            |             |             |   |   |
| C | 2.26123100  | -4.05837200 | 0.00000000  |   |            |             |             |   |   |
| S | -1.91045700 | 2.58717100  | 0.00000000  |   |            |             |             |   |   |

**C<sub>7</sub>S<sup>-</sup>**

| <b>7A</b> |            |            | <b>7B</b>   |   |            |             |             |
|-----------|------------|------------|-------------|---|------------|-------------|-------------|
|           | <b>X</b>   | <b>Y</b>   | <b>Z</b>    |   | <b>X</b>   | <b>Y</b>    | <b>Z</b>    |
| C         | 0.00000000 | 0.00000000 | -2.76743500 | C | 0.00000000 | 0.00000000  | -1.61083400 |
| C         | 0.00000000 | 0.00000000 | -1.49961500 | C | 0.00000000 | 0.00000000  | -0.36015900 |
| C         | 0.00000000 | 0.00000000 | -0.21519700 | C | 0.00000000 | 0.00000000  | 0.95055000  |
| C         | 0.00000000 | 0.00000000 | 1.07319400  | C | 0.00000000 | 0.00000000  | -2.93784600 |
| C         | 0.00000000 | 0.00000000 | 2.33971800  | C | 0.00000000 | 0.67385000  | -4.20014800 |
| C         | 0.00000000 | 0.00000000 | 3.93666300  | C | 0.00000000 | -0.67385000 | -4.20014800 |
| C         | 0.00000000 | 0.00000000 | -4.07878100 | C | 0.00000000 | 0.00000000  | 2.20296700  |
| S         | 0.00000000 | 0.00000000 | -5.34965400 | S | 0.00000000 | 0.00000000  | 3.80835700  |
| <b>7C</b> |            |            |             |   |            |             |             |
| C         | 0.00000000 | 0.00000000 | -2.78516800 |   |            |             |             |
| C         | 0.00000000 | 0.00000000 | -1.50040900 |   |            |             |             |
| C         | 0.00000000 | 0.00000000 | -0.22316900 |   |            |             |             |
| C         | 0.00000000 | 0.00000000 | 1.08143500  |   |            |             |             |
| C         | 0.00000000 | 0.00000000 | 2.34495100  |   |            |             |             |
| S         | 0.00000000 | 0.00000000 | 3.95705900  |   |            |             |             |
| C         | 0.00000000 | 0.00000000 | -4.08921200 |   |            |             |             |
| C         | 0.00000000 | 0.00000000 | -5.38058700 |   |            |             |             |

$C_2S_2^-$ 

|   | X           | 2A'         | Z           |   | X           | 2B'         | Z          |
|---|-------------|-------------|-------------|---|-------------|-------------|------------|
|   |             | Y           |             |   |             | Y           |            |
| C | 0.00000000  | 0.00000000  | 0.62434600  | C | 0.00000000  | 0.39687100  | 0.00000000 |
| S | 0.00000000  | 0.00000000  | 2.25877200  | C | -1.28577700 | 0.78145900  | 0.00000000 |
| C | 0.00000000  | 0.00000000  | -0.62434600 | S | -1.14979100 | -1.09113400 | 0.00000000 |
| S | 0.00000000  | 0.00000000  | -2.25877200 | S | 1.63195700  | 0.64926000  | 0.00000000 |
|   |             | 2C'         |             |   |             |             |            |
| S | -1.55827100 | -0.57014600 | 0.00000000  |   |             |             |            |
| C | 2.67992600  | -0.38765500 | 0.00000000  |   |             |             |            |
| C | 1.47546200  | -0.02152900 | 0.00000000  |   |             |             |            |
| S | 0.00000000  | 0.72359000  | 0.00000000  |   |             |             |            |

 $C_3S_2^-$ 

|   | X          | 3A'         | Z           |   | X          | 3B'         | Z           |
|---|------------|-------------|-------------|---|------------|-------------|-------------|
|   |            | Y           |             |   |            | Y           |             |
| C | 0.00000000 | 0.00000000  | 1.27855100  | C | 0.00000000 | 0.74165600  | 0.48321700  |
| S | 0.00000000 | 0.00000000  | 2.88743300  | C | 0.00000000 | 0.00000000  | 1.64617400  |
| C | 0.00000000 | 0.00000000  | 0.00000000  | C | 0.00000000 | -0.74165600 | 0.48321700  |
| C | 0.00000000 | 0.00000000  | -1.27855100 | S | 0.00000000 | 2.06533300  | -0.48986400 |
| S | 0.00000000 | 0.00000000  | -2.88743300 | S | 0.00000000 | -2.06533300 | -0.48986400 |
|   |            | 3C'         |             |   |            |             |             |
| C | 0.00000000 | 0.00000000  | 0.15840100  |   |            |             |             |
| C | 0.00000000 | 0.00000000  | 1.53105600  |   |            |             |             |
| C | 0.00000000 | 0.00000000  | 2.78573200  |   |            |             |             |
| S | 0.00000000 | 1.38723700  | -0.83909800 |   |            |             |             |
| S | 0.00000000 | -1.38723700 | -0.83909800 |   |            |             |             |

$C_4S_2^-$ 

|   | <b>4A'</b> |             |             | <b>4B'</b> |             |             |
|---|------------|-------------|-------------|------------|-------------|-------------|
|   | X          | Y           | Z           | X          | Y           | Z           |
| C | 0.00000000 | 0.00000000  | 1.91125900  | C          | 0.00000000  | 0.42910300  |
| C | 0.00000000 | 0.00000000  | 0.66110500  | C          | 1.08041400  | 1.04575500  |
| C | 0.00000000 | 0.00000000  | -0.66110500 | C          | -1.12602600 | -0.30008700 |
| C | 0.00000000 | 0.00000000  | -1.91125900 | C          | -2.45623900 | -0.48810900 |
| S | 0.00000000 | 0.00000000  | 3.53037000  | S          | -1.54014600 | -2.11912100 |
| S | 0.00000000 | 0.00000000  | -3.53037000 | S          | 2.47834100  | 1.86162300  |
|   | <b>4C'</b> |             |             |            |             |             |
| C | 0.00000000 | 1.95110900  | 0.49730900  |            |             |             |
| C | 0.00000000 | 0.62910600  | 0.38477400  |            |             |             |
| C | 0.00000000 | -0.62910600 | 0.38477400  |            |             |             |
| C | 0.00000000 | -1.95110900 | 0.49730900  |            |             |             |
| S | 0.00000000 | 3.34509200  | -0.33078100 |            |             |             |
| S | 0.00000000 | -3.34509200 | -0.33078100 |            |             |             |

 $C_5S_2^-$ 

|   | <b>5A'</b> |             |             | <b>5B'</b> |            |            |
|---|------------|-------------|-------------|------------|------------|------------|
|   | X          | Y           | Z           | X          | Y          | Z          |
| C | 0.00000000 | 0.00000000  | 2.55663100  | C          | 0.00000000 | 0.00000000 |
| C | 0.00000000 | 0.00000000  | 1.28940300  | C          | 0.00000000 | 0.00000000 |
| C | 0.00000000 | 0.00000000  | 0.00000000  | C          | 0.00000000 | 0.00000000 |
| C | 0.00000000 | 0.00000000  | -1.28940300 | C          | 0.00000000 | 0.00000000 |
| C | 0.00000000 | 0.00000000  | -2.55663100 | C          | 0.00000000 | 0.00000000 |
| S | 0.00000000 | 0.00000000  | 4.16157600  | S          | 0.00000000 | 0.00000000 |
| S | 0.00000000 | 0.00000000  | -4.16157600 | S          | 0.00000000 | 0.00000000 |
|   | <b>5C'</b> |             |             |            |            |            |
| C | 0.00000000 | 0.00000000  | -0.76973200 |            |            |            |
| C | 0.00000000 | 0.00000000  | 0.60013000  |            |            |            |
| S | 0.00000000 | 1.40210500  | -1.73640500 |            |            |            |
| S | 0.00000000 | -1.40210500 | -1.73640500 |            |            |            |
| C | 0.00000000 | 0.00000000  | 1.83650600  |            |            |            |
| C | 0.00000000 | 0.00000000  | 3.16778900  |            |            |            |
| C | 0.00000000 | 0.00000000  | 4.42613200  |            |            |            |

$C_6S_2^-$ 

|   |             | <b>6A'</b>  |             |   |             |             | <b>6B'</b> |   |   |
|---|-------------|-------------|-------------|---|-------------|-------------|------------|---|---|
|   |             | X           | Y           | Z |             |             | X          | Y | Z |
| C | 0.00000000  | 0.00000000  | 3.19231500  | C | 0.58643900  | 3.11676000  | 0.00000000 |   |   |
| C | 0.00000000  | 0.00000000  | 1.94035500  | C | 0.28985900  | 1.87077700  | 0.00000000 |   |   |
| C | 0.00000000  | 0.00000000  | 0.62531900  | C | 0.00000000  | 0.62812500  | 0.00000000 |   |   |
| C | 0.00000000  | 0.00000000  | -0.62531900 | C | -0.30568600 | -0.64511800 | 0.00000000 |   |   |
| C | 0.00000000  | 0.00000000  | -1.94035500 | C | -0.61052200 | -1.86530900 | 0.00000000 |   |   |
| S | 0.00000000  | 0.00000000  | 4.80259400  | S | 0.94786000  | 4.67585200  | 0.00000000 |   |   |
| C | 0.00000000  | 0.00000000  | -3.19231500 | C | -1.02622800 | -3.12524700 | 0.00000000 |   |   |
| S | 0.00000000  | 0.00000000  | -4.80259400 | S | -0.54805900 | -4.66834700 | 0.00000000 |   |   |
|   |             | <b>6C'</b>  |             |   |             |             |            |   |   |
| C | -0.88777000 | -0.49919700 | 0.00000000  |   |             |             |            |   |   |
| C | 0.00000000  | 0.36935400  | 0.00000000  |   |             |             |            |   |   |
| C | 0.93157400  | 1.30239600  | 0.00000000  |   |             |             |            |   |   |
| C | -1.81132800 | -1.47497200 | 0.00000000  |   |             |             |            |   |   |
| C | -3.07715000 | -1.93300200 | 0.00000000  |   |             |             |            |   |   |
| S | -1.81017200 | -3.31224400 | 0.00000000  |   |             |             |            |   |   |
| C | 1.81219600  | 2.18784600  | 0.00000000  |   |             |             |            |   |   |
| S | 2.94735100  | 3.33008500  | 0.00000000  |   |             |             |            |   |   |

 $C_7S_2^-$ 

|   |            | <b>7A'</b>  |             |   |            |            | <b>7B'</b>  |   |   |
|---|------------|-------------|-------------|---|------------|------------|-------------|---|---|
|   |            | X           | Y           | Z |            |            | X           | Y | Z |
| C | 0.00000000 | 0.00000000  | 2.57136800  | C | 0.00000000 | 0.00000000 | 2.58148800  |   |   |
| C | 0.00000000 | 0.00000000  | 1.27713100  | C | 0.00000000 | 0.00000000 | 1.28069600  |   |   |
| C | 0.00000000 | 0.00000000  | 0.00000000  | C | 0.00000000 | 0.00000000 | 0.00000000  |   |   |
| C | 0.00000000 | 0.00000000  | -1.27713100 | C | 0.00000000 | 0.00000000 | -1.28069600 |   |   |
| C | 0.00000000 | 0.00000000  | -2.57136800 | C | 0.00000000 | 0.00000000 | -2.58148800 |   |   |
| C | 0.00000000 | 0.00000000  | -3.83410400 | C | 0.00000000 | 0.00000000 | -3.84600700 |   |   |
| S | 0.00000000 | 0.00000000  | -5.43485800 | S | 0.00000000 | 0.00000000 | -5.45681400 |   |   |
| C | 0.00000000 | 0.00000000  | 3.83410400  | C | 0.00000000 | 0.00000000 | 3.84600700  |   |   |
| S | 0.00000000 | 0.00000000  | 5.43485800  | S | 0.00000000 | 0.00000000 | 5.45681400  |   |   |
|   |            | <b>7C'</b>  |             |   |            |            |             |   |   |
| C | 0.00000000 | 0.00000000  | -1.80915600 |   |            |            |             |   |   |
| C | 0.00000000 | 0.00000000  | -0.43475200 |   |            |            |             |   |   |
| S | 0.00000000 | 1.41154000  | -2.75361700 |   |            |            |             |   |   |
| S | 0.00000000 | -1.41154000 | -2.75361700 |   |            |            |             |   |   |
| C | 0.00000000 | 0.00000000  | 0.80054300  |   |            |            |             |   |   |
| C | 0.00000000 | 0.00000000  | 2.12309400  |   |            |            |             |   |   |
| C | 0.00000000 | 0.00000000  | 3.36478800  |   |            |            |             |   |   |
| C | 0.00000000 | 0.00000000  | 4.69047600  |   |            |            |             |   |   |
| C | 0.00000000 | 0.00000000  | 5.95096500  |   |            |            |             |   |   |



**Table S3** Harmonic vibrational frequencies ( $\text{cm}^{-1}$ ) and infrared intensities ( $\text{km/mol}$ ) (in parentheses) of the most stable isomers of  $\text{C}_n\text{S}$  ( $n = 2-7$ ) at the B3LYP/6-311+G(3d) level of theory. The frequencies labeled in bold are  $\pi$  modes.

| clusters                              | Vibrational frequency (Infrared intensity)                                                                                                                                  |
|---------------------------------------|-----------------------------------------------------------------------------------------------------------------------------------------------------------------------------|
| $\text{C}_2\text{S}$ ( $^3\Sigma^-$ ) | 1714(48); 862(13); <b>276(7)</b>                                                                                                                                            |
| $\text{C}_3\text{S}$ ( $^1\Sigma^+$ ) | 2127(1598); 1562(67); 739(12); <b>493(0)</b> ; <b>160(4)</b> .                                                                                                              |
| $\text{C}_4\text{S}$ ( $^3\Sigma^-$ ) | 2098(44); 1801(541); 1221 (3); 611 (6); <b>500(0)</b> ; <b>319(6)</b> ; <b>127(5)</b> .                                                                                     |
| $\text{C}_5\text{S}$ ( $^1\Sigma^+$ ) | 2219(4150); 2073(0); 1649(635); 1088(76); <b>579(3)</b> ; 542(6);<br><b>456(0)</b> ; <b>213(5)</b> ; <b>85(3)</b> .                                                         |
| $\text{C}_6\text{S}$ ( $^3\Sigma^-$ ) | 2113(68); 2074(1518); 1827(13); 1405(272); 936(29); <b>560(0)</b> ;<br>475(4); <b>469(0)</b> ; <b>338(1)</b> ; <b>183(6)</b> ; <b>70(3)</b> .                               |
| $\text{C}_7\text{S}$ ( $^1\Sigma^+$ ) | 2215(513); 2191(5737); 1996(3131); 1705(147); 1281(263); 853(87);<br><b>594(5)</b> ; <b>530(0)</b> ; <b>441(0)</b> ; 430(3); <b>244(2)</b> ; <b>138(4)</b> ; <b>52(2)</b> . |

**Table S4** Harmonic vibrational frequencies ( $\text{cm}^{-1}$ ) and infrared intensities ( $\text{km/mol}$ ) (in parentheses) of the most stable isomers of  $\text{C}_n\text{S}_2$  ( $n = 2-7$ ) at the B3LYP/ B3LYP/6-311+G(3d) level of theory. The frequencies labeled in bold are  $\pi$  modes.

| clusters                                  | Vibrational frequency (Infrared intensity)                                                                                                                                                         |
|-------------------------------------------|----------------------------------------------------------------------------------------------------------------------------------------------------------------------------------------------------|
| $\text{C}_2\text{S}_2$ ( $^3\Sigma_g^-$ ) | 1958(0); 1182(132); 553(0); <b>420(0)</b> ; <b>176(1)</b> .                                                                                                                                        |
| $\text{C}_3\text{S}_2$ ( $^1\Sigma_g^+$ ) | 2153(3166); 1713(0); 1037(353); <b>505(0)</b> ; 501(0); <b>415(0)</b> ; <b>98(0)</b> .                                                                                                             |
| $\text{C}_4\text{S}_2$ ( $^3\Sigma_g^-$ ) | 2116(0); 1927(845); 1411(0); 883(156); <b>511(0)</b> ; 440(0); <b>425(1)</b> ;<br><b>252(0)</b> ; <b>79(0)</b> .                                                                                   |
| $\text{C}_5\text{S}_2$ ( $^1\Sigma_g^+$ ) | 2191(6176); 2117(0); 1726(1646); 1276(0); 807(273); <b>562(2)</b> ; <b>474(0)</b> ;<br><b>417(1)</b> ; 404(0); <b>165(0)</b> ; <b>54(0)</b> .                                                      |
| $\text{C}_6\text{S}_2$ ( $^3\Sigma_g^-$ ) | 2111(2051); 2089(0); 1910(0); 1521(635); 1118(0); 721(159); <b>552(0)</b> ;<br><b>486(0)</b> ; <b>421(0)</b> ; 365(0); <b>293(1)</b> ; <b>138(0)</b> ; <b>46(0)</b> .                              |
| $\text{C}_7\text{S}_2$ ( $^1\Sigma_g^+$ ) | 2215(0); 2162(6267); 2024(7163); 1762(0); 1399(1098); 1031(0); 670(233);<br><b>586(3)</b> ; <b>528(0)</b> ; <b>459(1)</b> ; <b>417(0)</b> ; 339(0); <b>209(0)</b> ; <b>104(0)</b> ; <b>35(0)</b> . |
